# Supplementary material
Source: PubMed Central journal article supplement (PMC10836760)

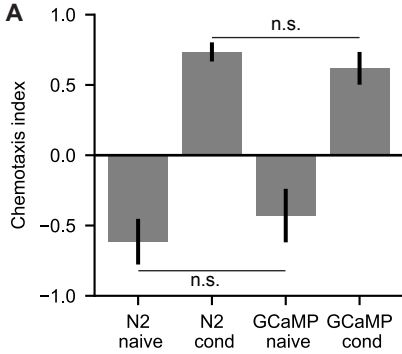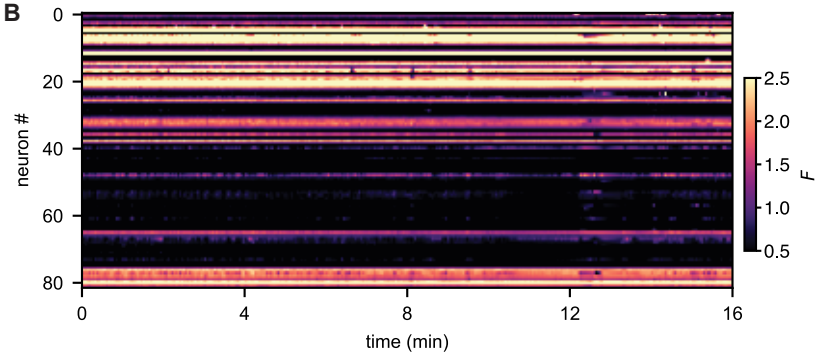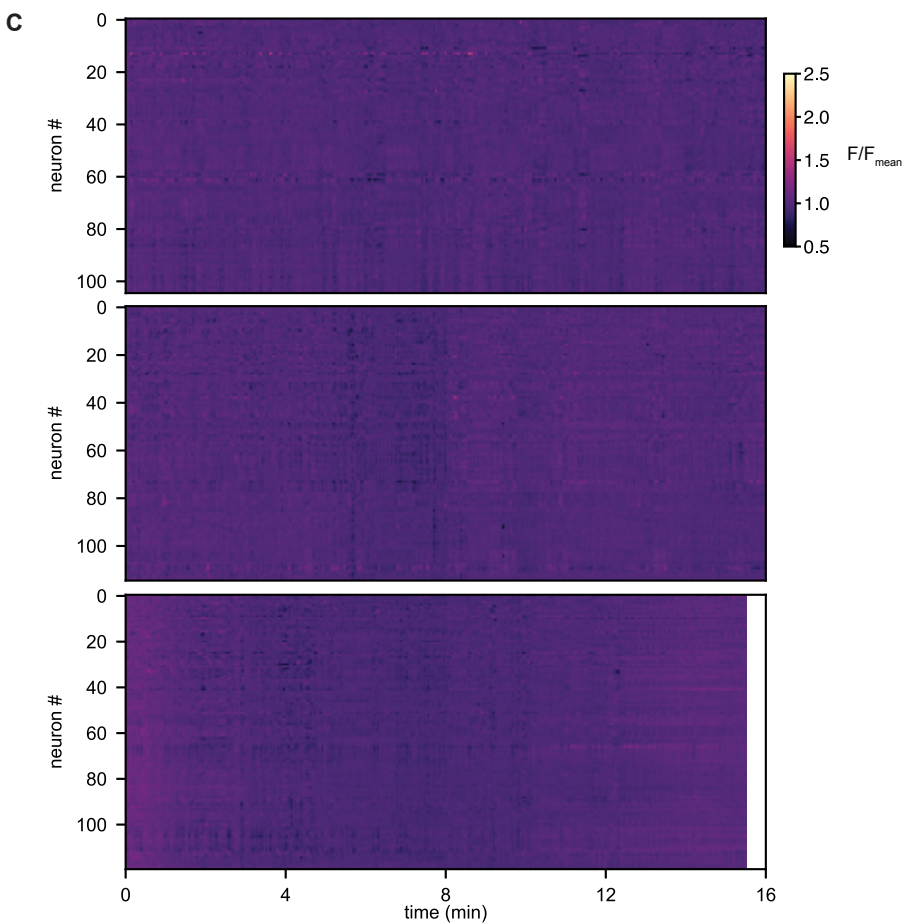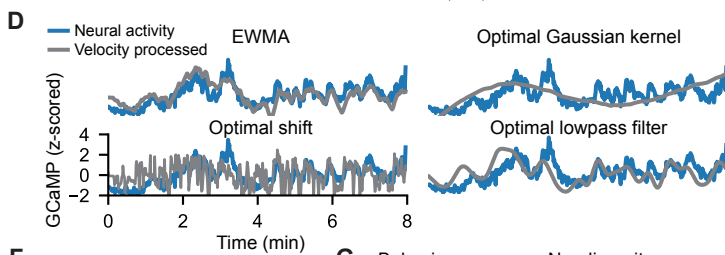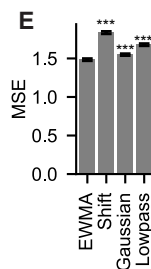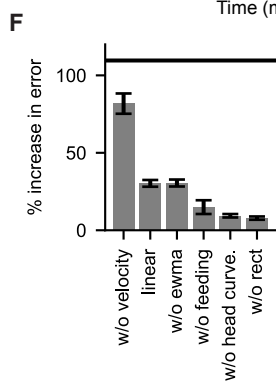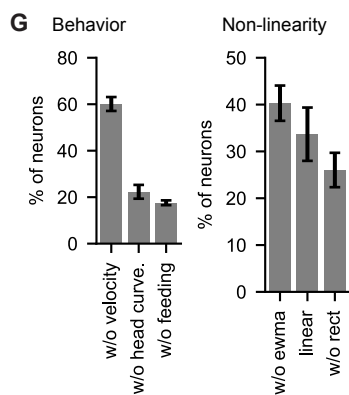

Supplement: NIHMS1958618-supplement-figure_s1.pdf [file NIHMS1958618-supplement-figure_s1.pdf]

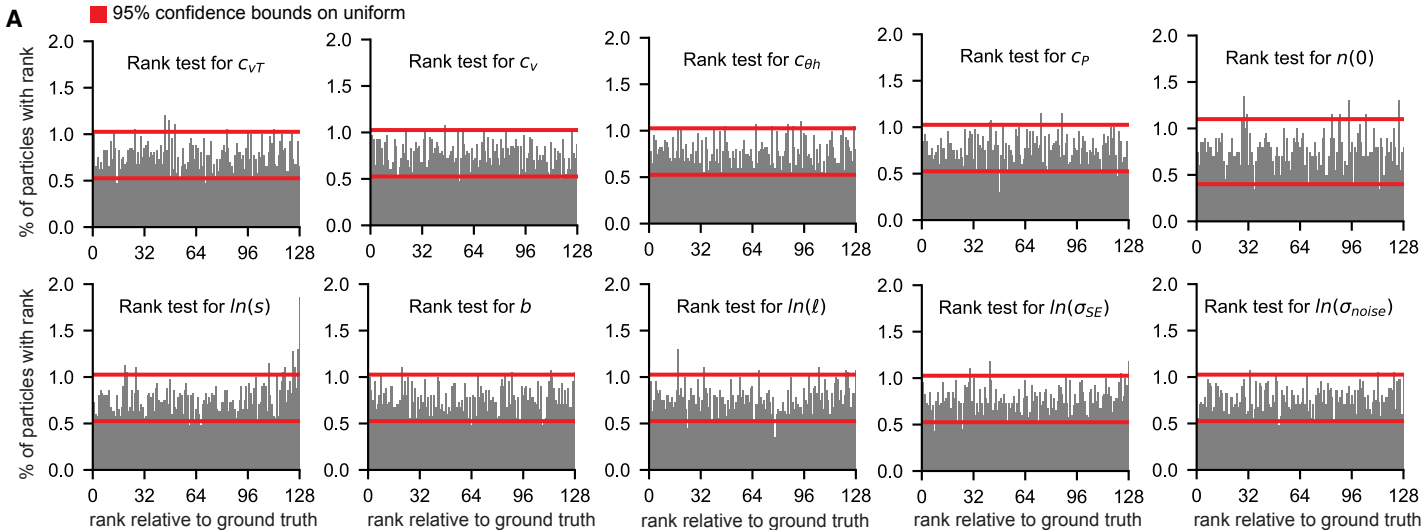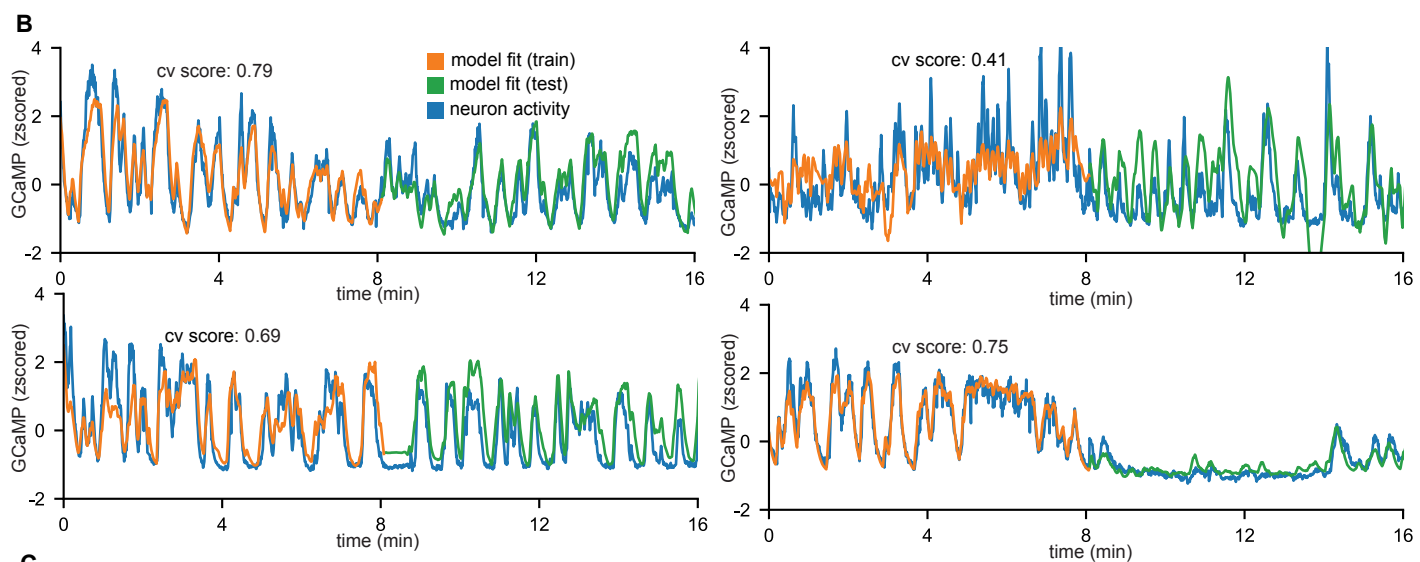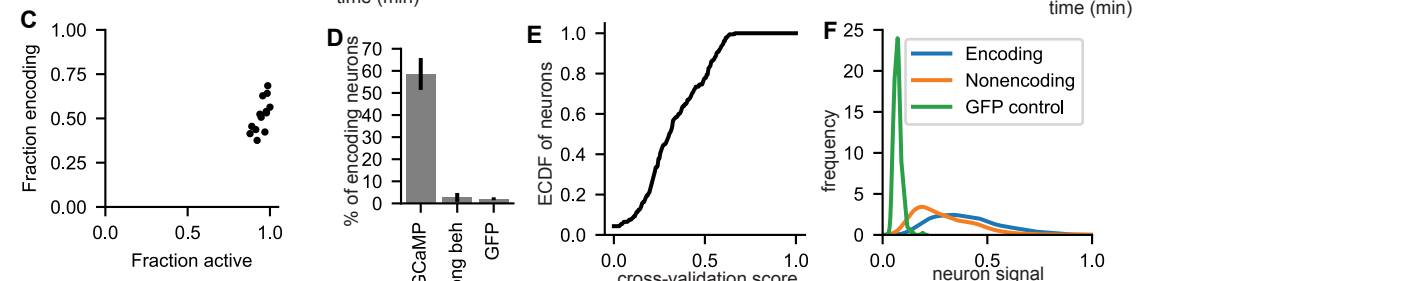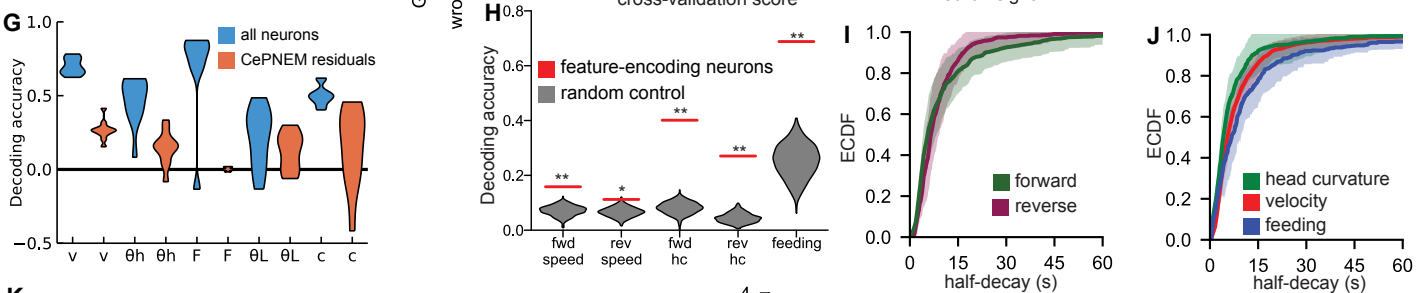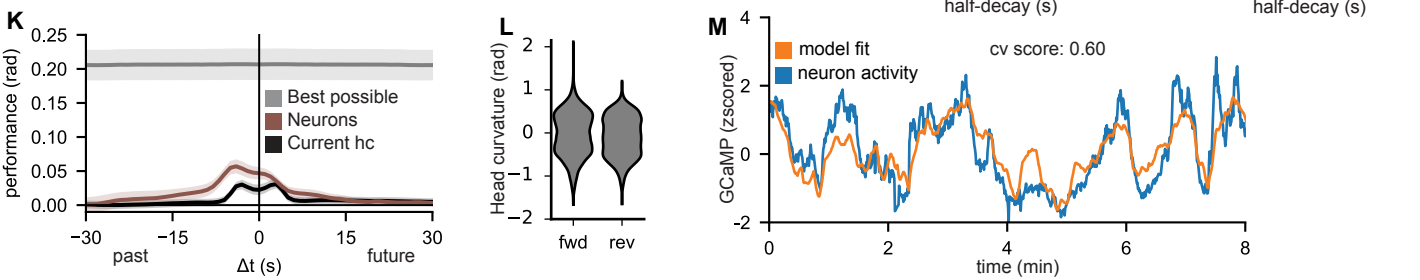

Supplement: NIHMS1958618-supplement-figure_s2.pdf [file NIHMS1958618-supplement-figure_s2.pdf]

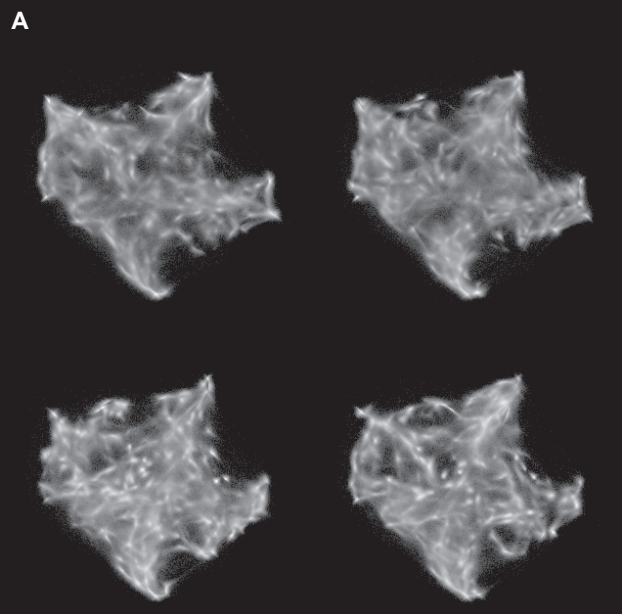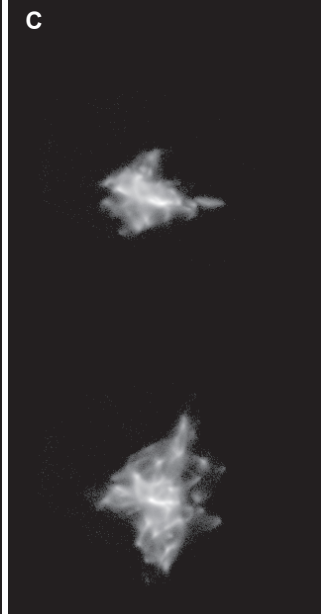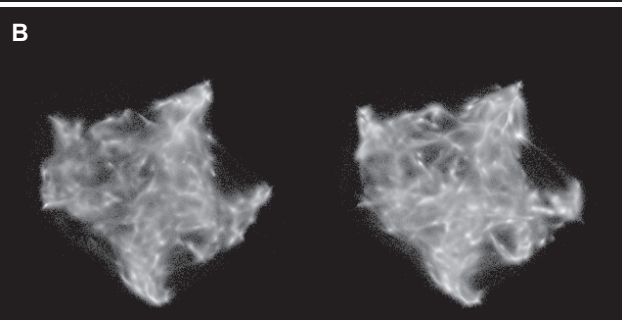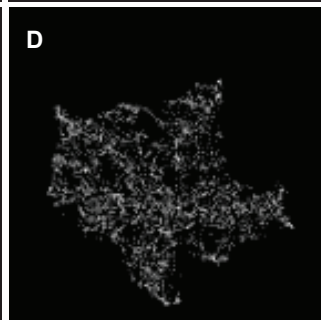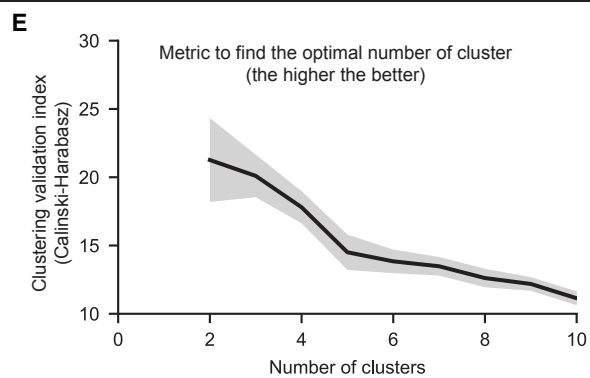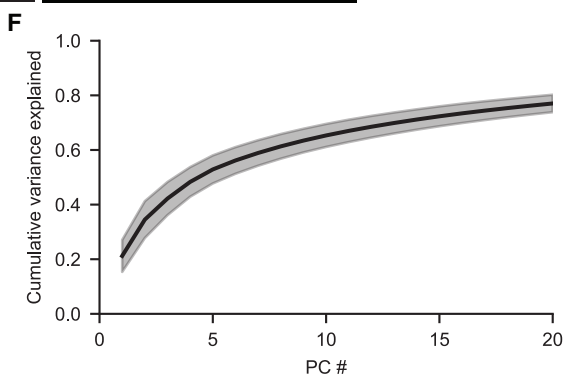

Supplement: NIHMS1958618-supplement-figure_s3.pdf [file NIHMS1958618-supplement-figure_s3.pdf]

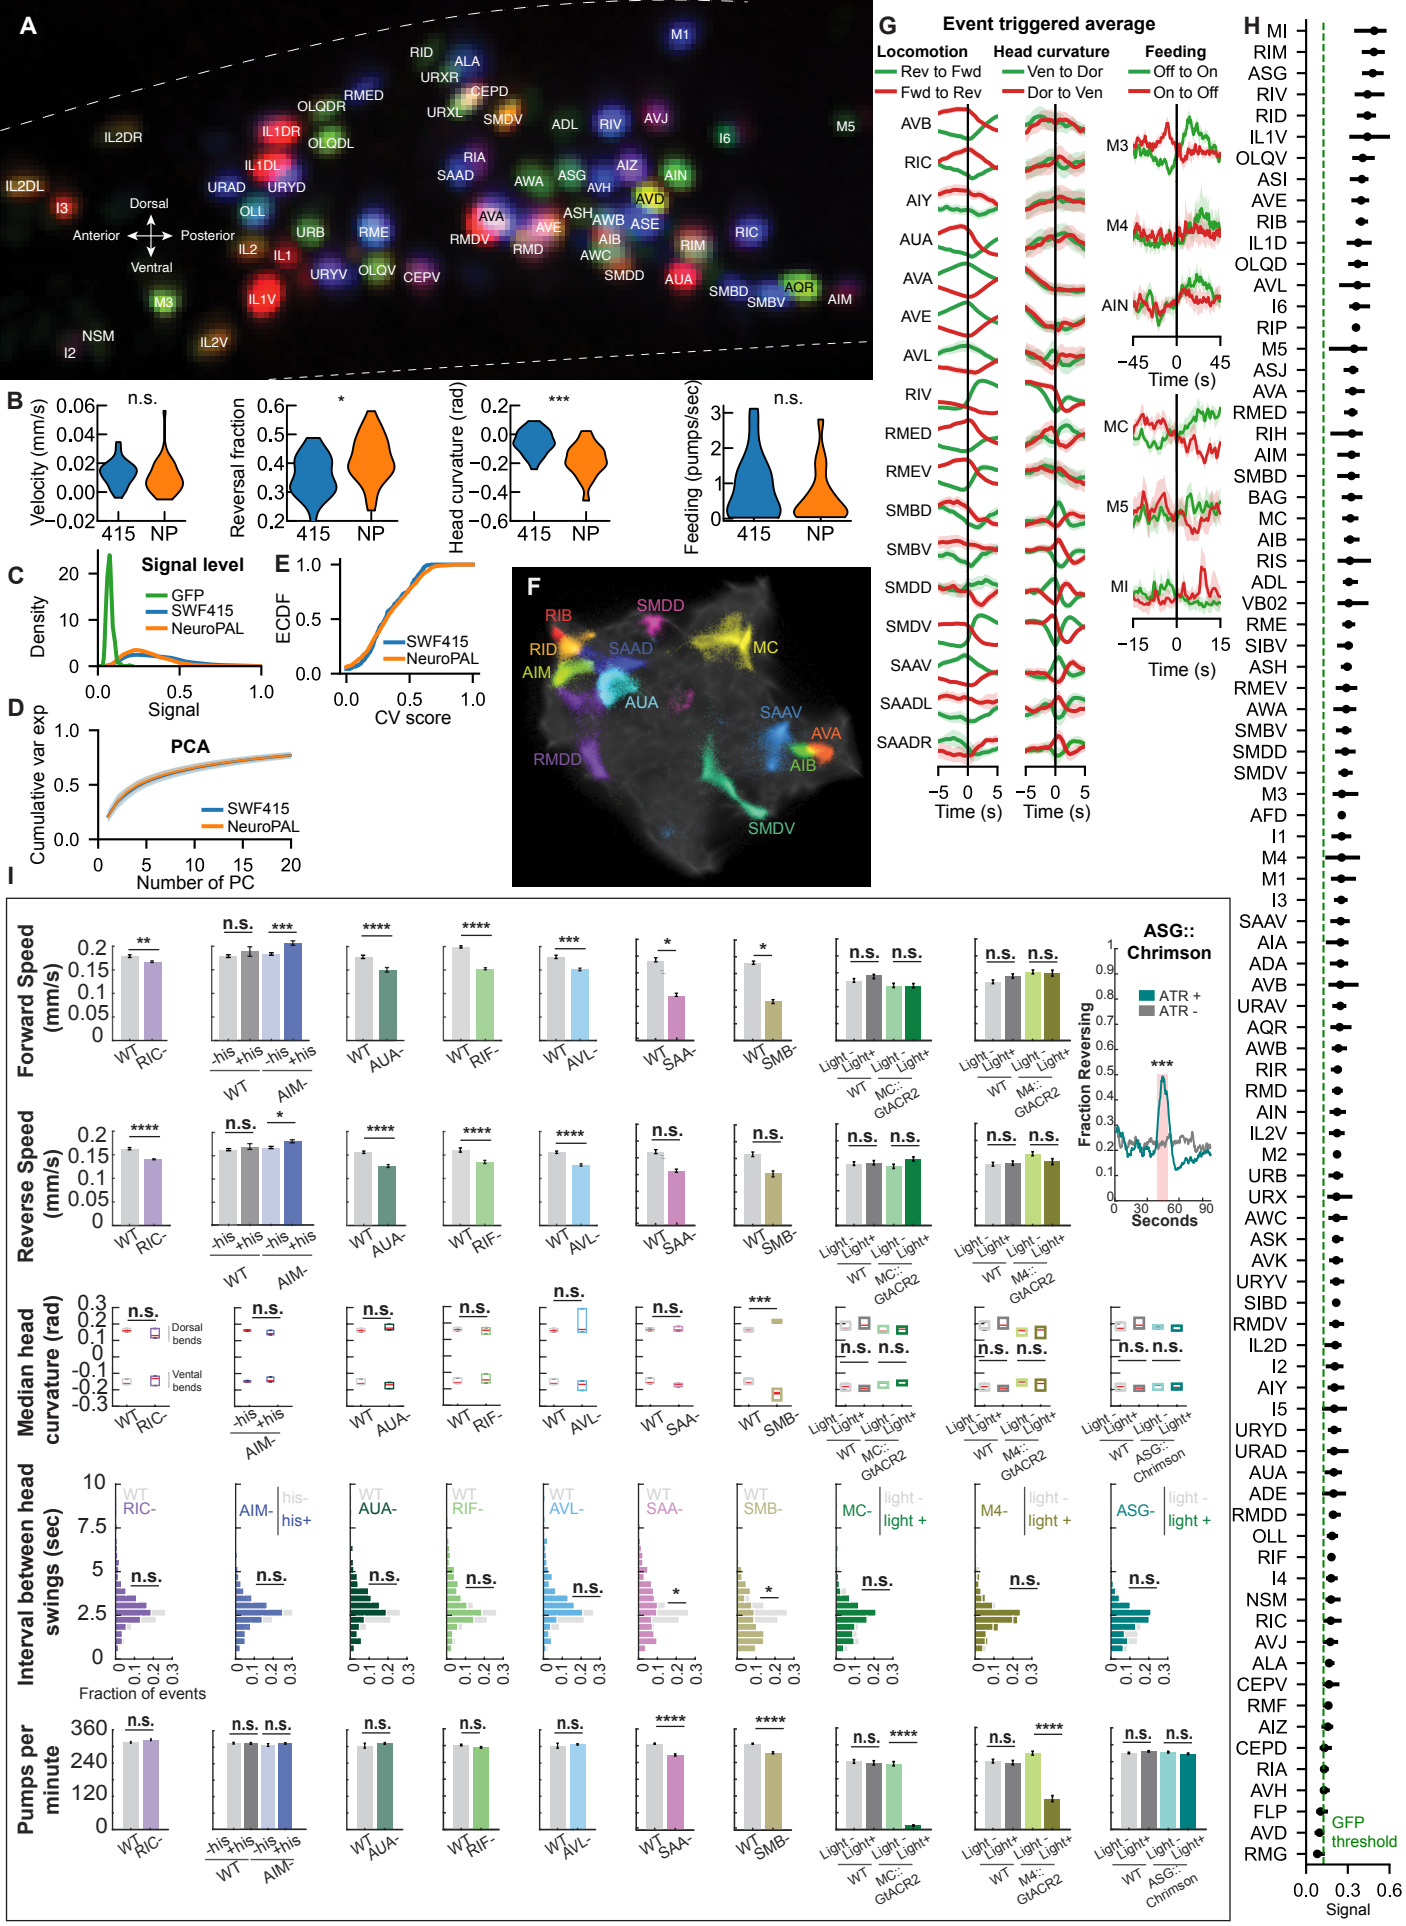

Supplement: NIHMS1958618-supplement-figure_s4.pdf [file NIHMS1958618-supplement-figure_s4.pdf]

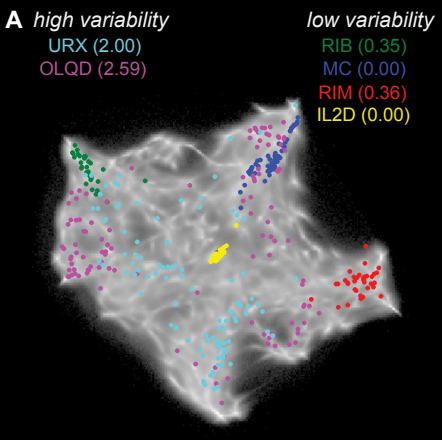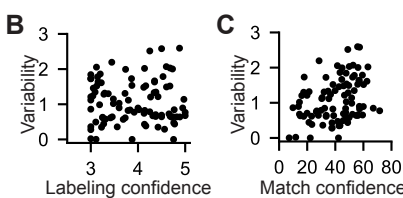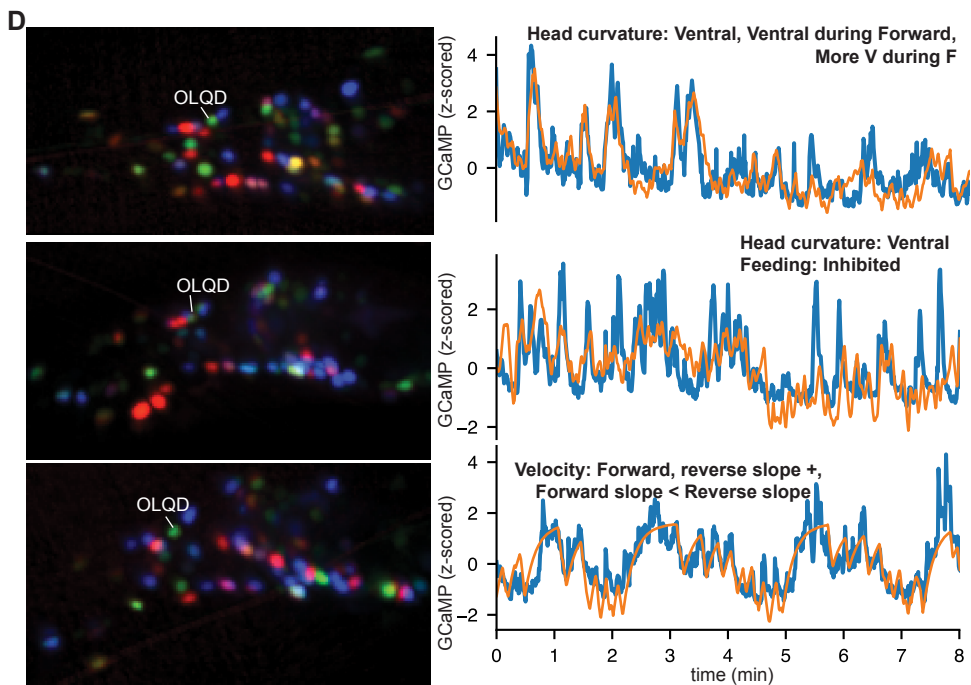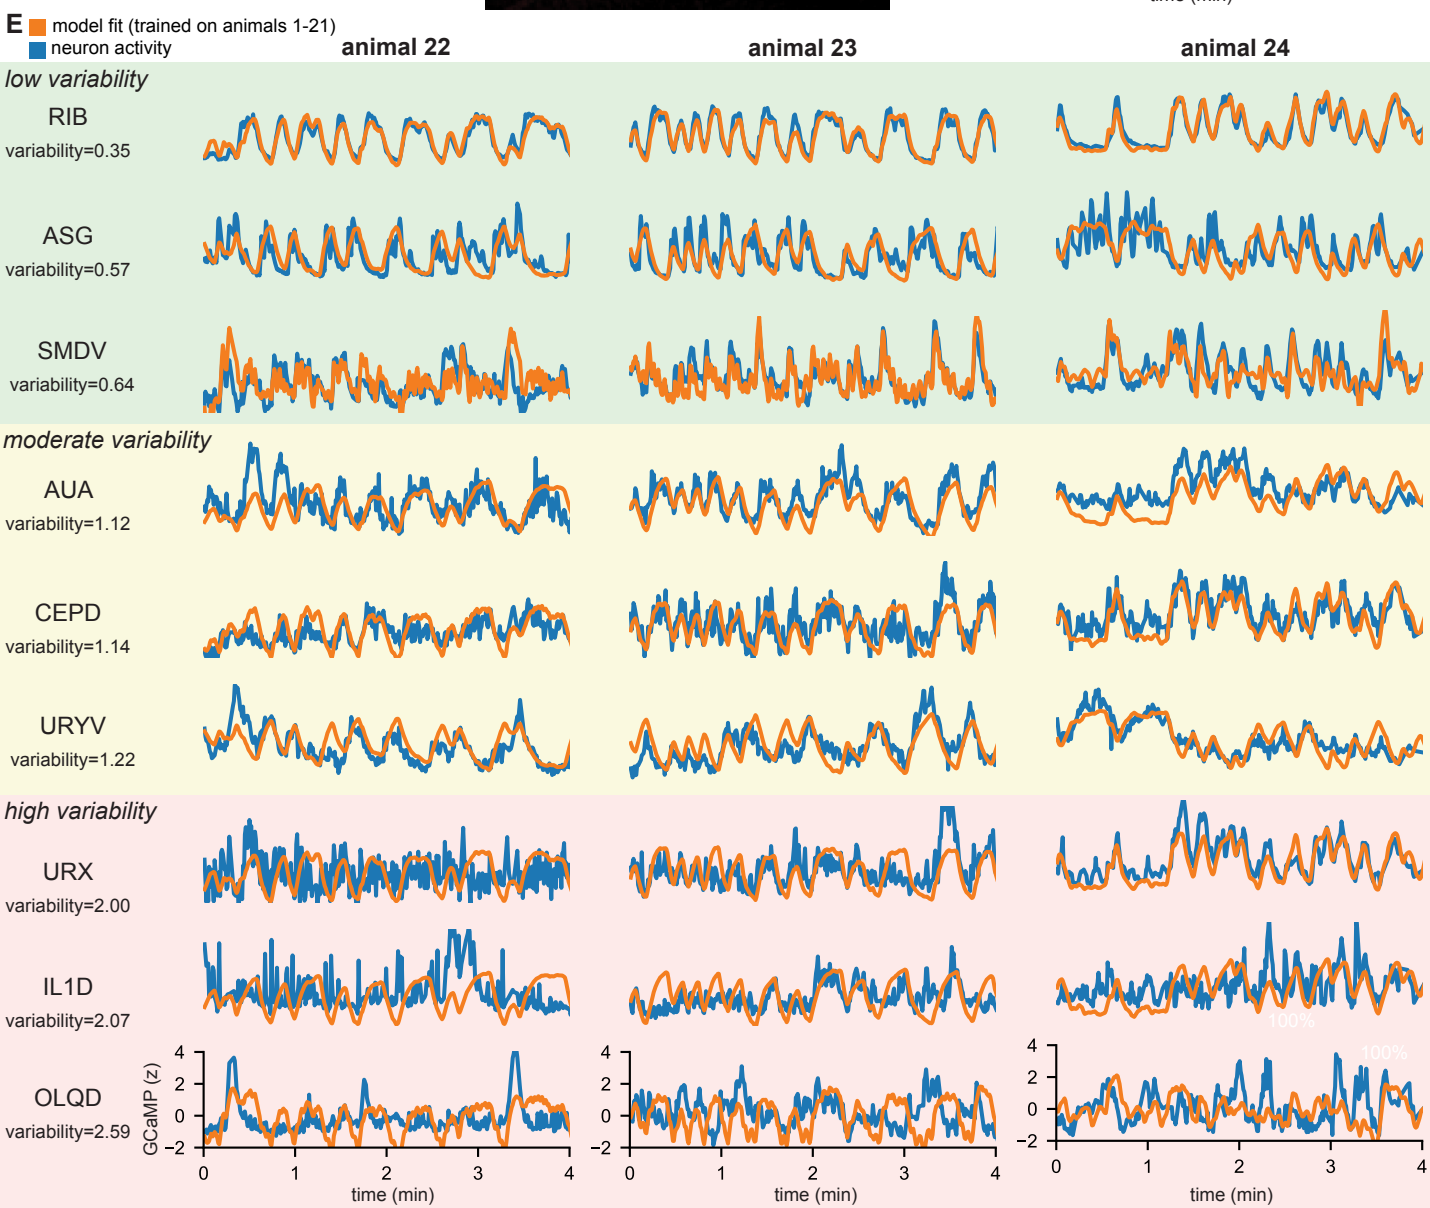

Supplement: NIHMS1958618-supplement-figure_s5.pdf [file NIHMS1958618-supplement-figure_s5.pdf]

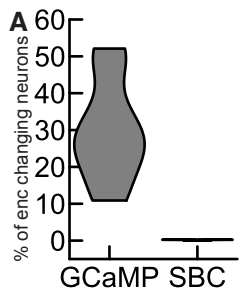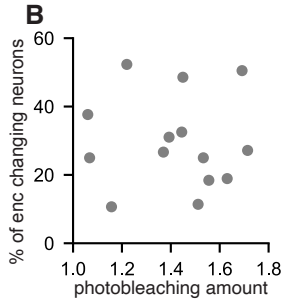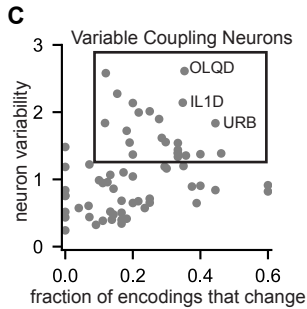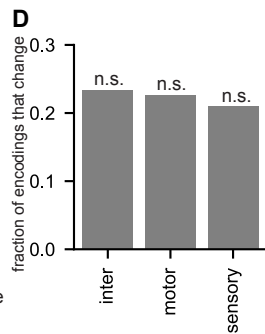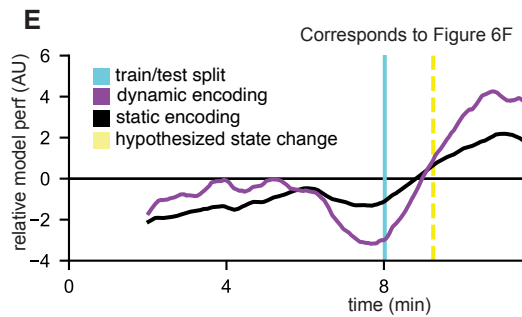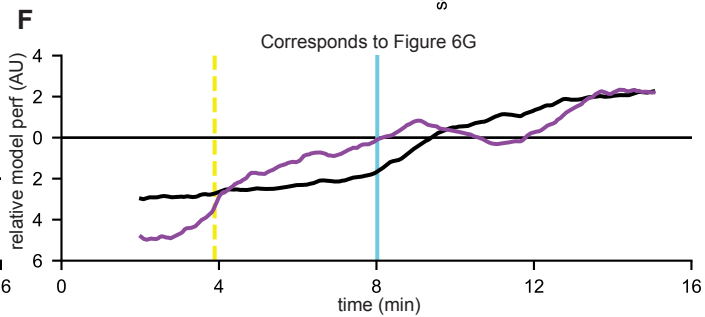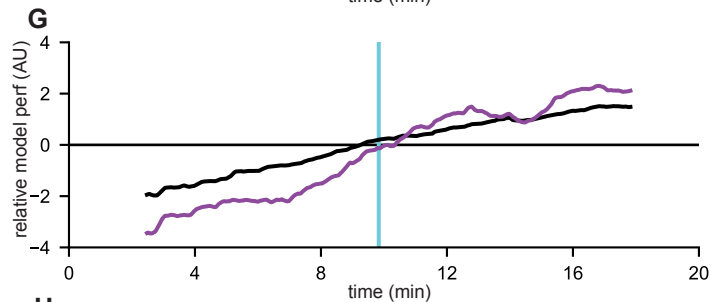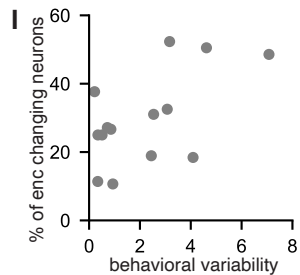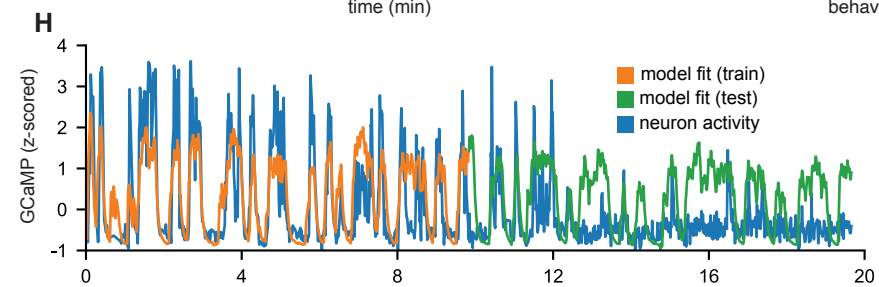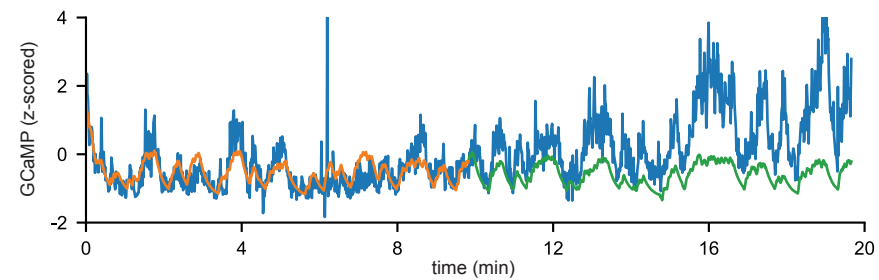

Supplement: NIHMS1958618-supplement-figure_s6.pdf [file NIHMS1958618-supplement-figure_s6.pdf]

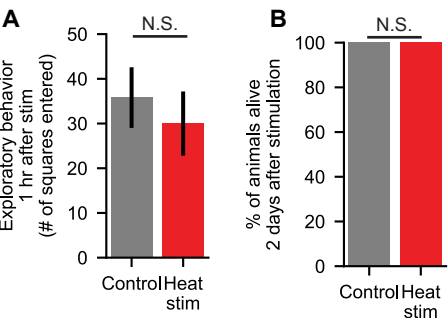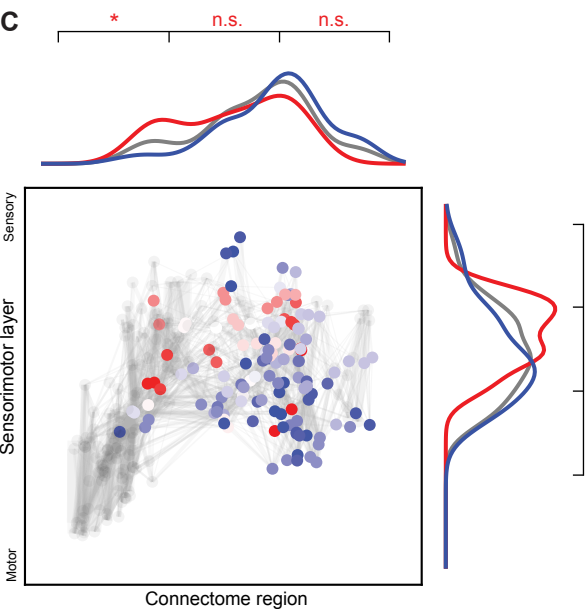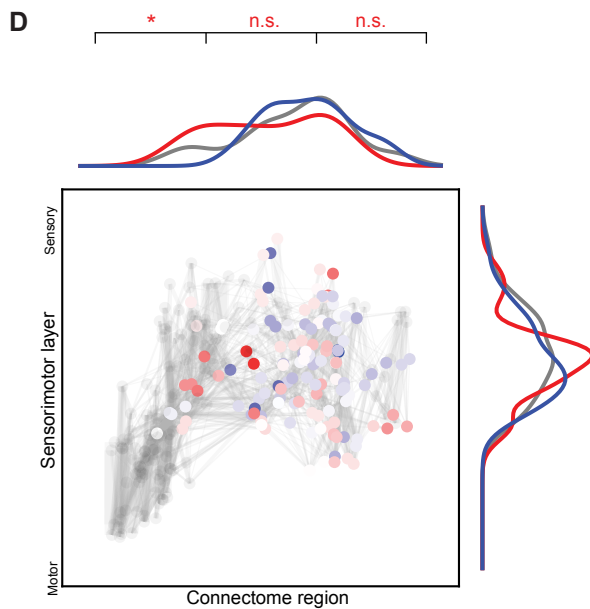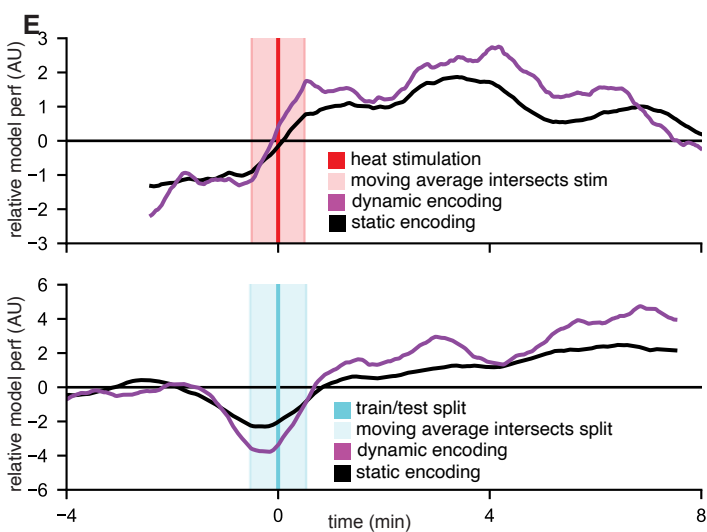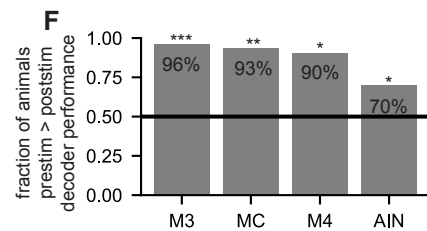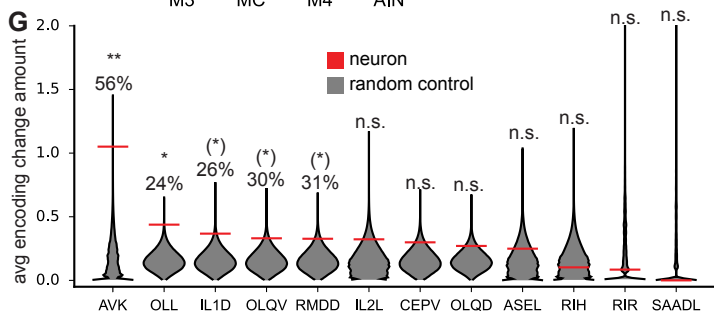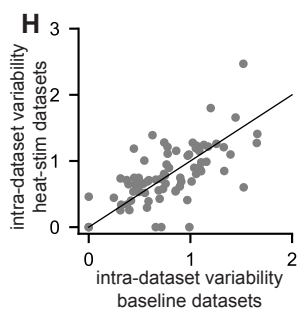

Supplement: NIHMS1958618-supplement-figure_s7.pdf [file NIHMS1958618-supplement-figure_s7.pdf]
